# Supplementary material for: Wasting and Underweight in Northern African Children: Findings from Multiple-Indicator Cluster Surveys, 2014–2018
Source: MDPI journal article supplement (doi:10.3390/nu15143207), 2023-07-19
Supplement: s1 [file s1]

**Table S1.** Prevalence and 95% confidence intervals (CIs) of wasting and underweight among children (0-23, 24-59 and 0-59 months) in four Northern African countries, N= 37816.

| <i>Variables</i>                | Wasted children (0-23 months) | Wasted children (24-59 months) | Wasted children (0-59 months) | Children underweight (0-23 months) | Children underweight (24-59 months) | Children underweight (0-59 months) |
|---------------------------------|-------------------------------|--------------------------------|-------------------------------|------------------------------------|-------------------------------------|------------------------------------|
|                                 | % (95% CI)                    | % (95% CI)                     | % (95% CI)                    | % (95% CI)                         | % (95% CI)                          | % (95% CI)                         |
| <b>Geographical zone</b>        |                               |                                |                               |                                    |                                     |                                    |
| Algeria                         | 4.68 [4.00,5.48]              | 4.7 [4.00, 5.48]               | 1.6 [1.306, 1.897]            | 3.41 [2.897, 4.00]                 | 2.1 [1.79, 2.48]                    | 2.6 [2.33, 2.93]                   |
| Egypt                           | 4.17 [3.31,5.23]              | 4.2 [3.31, 5.23]               | 1.5 [1.069, 2.034]            | 7.65 [6.46, 9.03]                  | 3.5 [2.82, 4.43]                    | 5.3 [4.66, 6.11]                   |
| Sudan                           | 17.79 [16.42, 19.26]          | 17.8 [16.42, 19.26]            | 14.8 [13.78, 15.93]           | 24.63 [23.11, 26.21]               | 33.0 [31.6, 34.38]                  | 29.6 [28.57, 30.66]                |
| Tunisia                         | 2.90 [2.06, 4.08]             | 2.9 [2.06, 4.08]               | 1.4 [0.95, 1.92]              | 2.53 [1.78, 3.59]                  | 1.0 [0.62, 1.45]                    | 1.5 [1.16, 2.00]                   |
| <b>Place of residence</b>       |                               |                                |                               |                                    |                                     |                                    |
| Urban                           | 6.7 [5.6,8.0]                 | 3.4 (2.9, 3.9)                 | 4.7 [4.1,5.4]                 | 7.3 [6.2,8.6]                      | 6.1 [5.4,6.9]                       | 6.6 [5.9,7.3]                      |
| Rural                           | 11.3 [10.1,12.5]              | 8.9 (7.9, 10.0)                | 9.8 [9.0,10.8]                | 15.5 [14.1,17.0]                   | 19.8 [17.9,21.7]                    | 18.0 [16.5,19.6]                   |
| <b>Household wealth Index</b>   |                               |                                |                               |                                    |                                     |                                    |
| Poorest                         | 8.6 [7.2,10.2]                | 8.5 [7.2,10.0]                 | 8.5 [7.4,9.8]                 | 11.8 [10.2,13.7]                   | 14.2 [12.4,16.1]                    | 13.3 [11.8,14.9]                   |
| Poor                            | 11.5 [9.9,13.4]               | 7.6 [6.3,9.2]                  | 9.2 [8.1,10.4]                | 14.3 [12.6,16.2]                   | 17.3 [15.6,19.2]                    | 16.1 [14.7,17.6]                   |
| Middle                          | 8.0 [6.5,9.8]                 | 3.7 [3.0,4.5]                  | 5.4 [4.6,6.2]                 | 11.2 [9.4,13.4]                    | 10.7 [9.2,12.3]                     | 10.9 [9.6,12.3]                    |
| Fourth                          | 7.2 [5.9,8.7]                 | 5.1 [4.2,6.3]                  | 6.0 [5.1,7.1]                 | 9.3 [7.6,11.3]                     | 11.3 [9.0,14.2]                     | 10.5 [8.6,12.7]                    |
| Richest                         | 9.4 [7.2,12.1]                | 5.4 [4.5,6.5]                  | 7.0 [5.8,8.3]                 | 10.3 [8.7,12.2]                    | 10.3 [8.9,12.0]                     | 10.3 [9.0,11.8]                    |
| <b>Gender</b>                   |                               |                                |                               |                                    |                                     |                                    |
| Boy                             | 8.9 [7.7,10.2]                | 6.7 [6.0,7.5]                  | 7.6 [6.8,8.3]                 | 12.0 [10.8,13.3]                   | 13 [11.9,14.3]                      | 12.6 [11.6,13.7]                   |
| Girl                            | 8.9 [8.0,9.8]                 | 5.4 [4.7,6.1]                  | 6.7 [6.2,7.4]                 | 10.6 [9.5,11.7]                    | 12.2 [11.1,13.4]                    | 11.6 [10.7,12.5]                   |
| <b>Child age</b>                |                               |                                |                               |                                    |                                     |                                    |
| 0-5                             | 8.8 [7.7,10.1]                |                                | 8.8 [7.7,10.1]                | 9.5 [8.3,10.9]                     |                                     | 9.5 [8.3,10.9]                     |
| 6-11                            | 10.0 [8.1,12.3]               |                                | 10.0 [8.1,12.3]               | 11.4 [9.9,13.1]                    |                                     | 11.4 [9.9,13.1]                    |
| 12-17                           | 9.5 [8.2,10.9]                |                                | 9.5 [8.2,10.9]                | 12.0 [10.5,13.6]                   |                                     | 12.0 [10.5,13.6]                   |
| 18-23                           | 7.2 [5.9,8.6]                 |                                | 7.2 [5.9,8.6]                 | 12.4 [10.9,14.0]                   |                                     | 12.4 [10.9,14.0]                   |
| 24-29                           | -                             | 7.8 [6.6,9.1]                  | 7.8 [6.6,9.1]                 | -                                  | 13.5 [11.6,15.7]                    | 13.5 [11.6,15.7]                   |
| 30-35                           | -                             | 5.5 [4.6,6.6]                  | 5.5 [4.6,6.6]                 | -                                  | 13.4 [12.0,14.9]                    | 13.4 [12.0,14.9]                   |
| 36-41                           | -                             | 5.3 [4.3,6.5]                  | 5.3 [4.3,6.5]                 |                                    | 11.8 [10.3,13.6]                    | 11.8 [10.3,13.6]                   |
| 42-47                           | -                             | 6 [5.0,7.2]                    | 6.0 [5.0,7.2]                 | -                                  | 14.5 [12.9,16.3]                    | 14.5 [12.9,16.3]                   |
| 48-53                           | -                             | 5.9 [5.0,6.9]                  | 5.9 [5.0,6.9]                 | -                                  | 10.9 [9.6,12.2]                     | 10.9 [9.6,12.2]                    |
| 54-59                           | -                             | 5.7 [4.6,7.2]                  | 5.7 [4.6,7.2]                 | -                                  | 11.8 [9.8,14.1]                     | 11.8 [9.8,14.1]                    |
| <b>Mother's age</b>             |                               |                                |                               |                                    |                                     |                                    |
| 15-19 years                     | 8.8 [6.2,12.2]                | 4.9 [3.1,7.6]                  | 6.7 [4.8,9.2]                 | 13.7 [10.5,17.7]                   | 8.2 [6.0,11.1]                      | 10.8 [8.7,13.4]                    |
| 20-34 years                     | 9.2 [8.3,10.1]                | 6.4 [5.7,7.2]                  | 7.6 [7.0,8.3]                 | 11.5 [10.5,12.6]                   | 13.8 [12.6,15.0]                    | 12.8 [11.9,13.8]                   |
| 35-49years                      | 7.8 [6.8,9.0]                 | 5.3 [4.6,6.1]                  | 6.1 [5.5,6.8]                 | 10.5 [9.2,11.9]                    | 11 [9.6,12.5]                       | 10.8 [9.7,12.0]                    |
| <b>Father's age</b>             |                               |                                |                               |                                    |                                     |                                    |
| 18-34                           | 9.8 [8.5,11.4]                | 8.7 [7.4,10.3]                 | 9.3 [8.2,10.5]                | 15.4 [13.4,17.7]                   | 19.7 [17.6,21.9]                    | 17.6 [15.8,19.4]                   |
| 35-44                           | 8.0 [7.1,9.1]                 | 5.6 [4.9,6.3]                  | 6.5 [6.0,7.2]                 | 9.4 [8.5,10.5]                     | 9.9 [9.0,11.0]                      | 9.7 [8.9,10.6]                     |
| 45+                             | 10.8 [9.2,12.7]               | 6.3 [5.5,7.3]                  | 7.8 [6.9,8.8]                 | 14.5 [12.8,16.3]                   | 16.3 [14.5,18.3]                    | 15.7 [14.1,17.4]                   |
| <b>Mother's age at marriage</b> |                               |                                |                               |                                    |                                     |                                    |
| < 18 years                      | 15.2 [13.3,17.2]              | 11.4 [10.0,12.9]               | 12.9 [11.7,14.2]              | 20.8 [18.9,23.0]                   | 27.1 [24.9,29.5]                    | 24.5 [22.7,26.4]                   |
| >18 years                       | 6.9 [6.3,7.7]                 | 4.6 [4.1,5.1]                  | 5.5 [5.1,6.0]                 | 8.7 [7.8,9.6]                      | 8.7 [7.8,9.6]                       | 8.7 [8.0,9.4]                      |
| <b>Marital status</b>           |                               |                                |                               |                                    |                                     |                                    |
| Married                         | 9.0 [8.2,9.8]                 | 6.2 [5.6,6.9]                  | 7.3 [6.8,7.9]                 | 11.8 [10.8,12.8]                   | 13.1 [12.1,14.3]                    | 12.6 [11.7,13.5]                   |
| Not married                     | 12.2 [5.6,24.7]               | 8.2 [6.1,11.1]                 | 9.4 [6.6,13.3]                | 10.1 [6.7,14.9]                    | 16.1 [13.5,19.2]                    | 14.4 [12.2,16.9]                   |

|                                   |                  |                  |                  |                  |                  |                  |
|-----------------------------------|------------------|------------------|------------------|------------------|------------------|------------------|
| <b>Maternal education level</b>   |                  |                  |                  |                  |                  |                  |
| No schooling                      | 11.3 [10.0,12.7] | 3.9 [3.3,4.7]    | 9.5 [8.7,10.4]   | 15.3 [13.8,16.9] | 6.2 [5.4,7.0]    | 18.0 [16.4,19.7] |
| Primary                           | 9.5 [8.2,11.0]   | 6.5 [5.6,7.6]    | 7.7 [6.9,8.6]    | 12.6 [11.1,14.1] | 14 [12.6,15.6]   | 13.4 [12.2,14.7] |
| Secondary and above               | 7.1 [5.7,8.7]    | 8.5 [7.5,9.6]    | 5.3 [4.6,6.1]    | 7.8 [6.7,9.1]    | 19.7 [17.7,21.8] | 6.9 [6.1,7.7]    |
| <b>Maternal BMI</b>               |                  |                  |                  |                  |                  |                  |
| 19-25                             | 0                | 0                | 0                | 0.8 [0.5,1.3]    | 1.4 [0.9,2.2]    | 1.1 [0.8,1.5]    |
| <=18.5                            | 11.3 [10.3,12.4] | 6.8 [6.1, 7.4]   | 8.4 [7.8,9.1]    | 14.0 [13.0,15.2] | 13.9 [12.8,15.1] | 14.0 [13.0,15.0] |
| 25+                               | 0                | 0                | 0                | 3.8 [1.6,8.7]    | 2.7 [1.2,6.0]    | 3.1 [1.8,5.6]    |
| <b>Household members</b>          |                  |                  |                  |                  |                  |                  |
| 2-4                               | 7.3 [6.3,8.5]    | 4.5 [3.8,5.4]    | 5.8 [5.1,6.5]    | 10.2 [8.8,11.7]  | 8.2 [7.3,9.3]    | 9.1 [8.2,10.1]   |
| 5-10                              | 9.2 [8.4,10.0]   | 6.5 [5.8,7.2]    | 7.5 [6.9,8.1]    | 11.4 [10.4,12.5] | 13.8 [12.7,15.0] | 12.9 [12.0,13.9] |
| >10                               | 13.1 [8.1,20.4]  | 6.9 [5.2,9.1]    | 9.5 [6.9,13.0]   | 14.9 [11.6,18.8] | 17.2 [13.7,21.4] | 16.2 [13.6,19.3] |
| <b>Number of children under 5</b> |                  |                  |                  |                  |                  |                  |
| 1                                 | 7.3 [6.1,8.7]    | 4.5 [4.0,5.2]    | 5.6 [5.0,6.3]    | 8.5 [7.6,9.6]    | 8.9 [8.1,9.7]    | 8.7 [8.1,9.4]    |
| 2 or more                         | 10.2 [9.2,11.2]  | 7.3 [6.6,8.2]    | 8.5 [7.8,9.2]    | 13.5 [12.3,14.7] | 15.9 [14.5,17.5] | 14.9 [13.8,16.2] |
| <b>Birth order</b>                |                  |                  |                  |                  |                  |                  |
| Non previous                      | 4.1 [3.3,5.0]    | 1.6 [1.2,2.2]    | 2.8 [2.4,3.4]    | 4.4 [3.6,5.4]    | 2 [1.5,2.8]      | 3.2 [2.7,3.8]    |
| 1                                 | 8.8 [7.8,9.9]    | 4.9 [4.3,5.6]    | 6.4 [5.8,7.0]    | 11.5 [10.2,13.0] | 10.4 [9.4,11.5]  | 10.8 [9.9,11.8]  |
| 2-3                               | 11.0 [9.1,13.2]  | 7.7 [6.8,8.8]    | 8.9 [7.8,10.2]   | 13.1 [11.6,14.7] | 16.1 [14.7,17.7] | 15.0 [13.8,16.3] |
| 4+                                | 16 [13.4,18.9]   | 11.6 [9.8,13.5]  | 13.1 [11.7,14.7] | 23.2 [20.1,26.6] | 26 [22.8,29.5]   | 25.0 [22.5,27.6] |
| <b>Place of delivery</b>          |                  |                  |                  |                  |                  |                  |
| Health facility                   | 5.9 [5.1,6.7]    |                  | -                | 6.8 [6.0,7.7]    |                  | -                |
| Home                              | 17.2 [15.6,18.9] |                  | -                | 24.4 [22.7,26.3] |                  | -                |
| <b>Antenatal clinic visits</b>    |                  |                  |                  |                  |                  |                  |
| 8+                                | 5.6 [4.4,7.0]    |                  | -                | 7.2 [5.8,9.0]    |                  | -                |
| 4-7                               | 8.0 [7.0,9.0]    |                  | -                | 10.5 [9.4,11.7]  |                  | -                |
| 1-3                               | 10.8 [9.4,12.4]  |                  | -                | 14.1 [12.5,16.0] |                  | -                |
| None                              | 11.8 [9.5,14.5]  |                  | -                | 13.2 [11.5,15.2] |                  | -                |
| <b>Delivery assistance</b>        |                  |                  |                  |                  |                  |                  |
| Skilled                           | 8.4 [7.6,9.3]    |                  | -                | 10.7 [9.8,11.8]  |                  | -                |
| Unskilled                         | 11.2 [8.9,13.9]  |                  | -                | 14.0 [12.2,15.9] |                  | -                |
| <b>Mode of delivery</b>           |                  |                  |                  |                  |                  |                  |
| Non-caesarean                     | 5.6 [4.8,6.5]    |                  | -                | 6.6 [5.7,7.6]    |                  | -                |
| Caesarean                         | 6.5 [5.4,7.9]    |                  | -                | 7.4 [6.0,9.1]    |                  | -                |
| <b>Cooking fuels</b>              |                  |                  |                  |                  |                  |                  |
| Clean                             | 6.3 [5.4,7.3]    | 3.2 [2.8,3.7]    | 4.4 [3.9,5.0]    | 7.2 [6.3,8.3]    | 6.6 [5.6,7.7]    | 6.8 [6.0,7.8]    |
| Un clean                          | 18.7 [16.9,20.8] | 16.4 [14.6,18.3] | 17.3 [16.0,18.7] | 26 [23.9,28.1]   | 34.9 [32.7,37.2] | 31.3 [29.5,33.2] |
| <b>Source of drinking water</b>   |                  |                  |                  |                  |                  |                  |
| Protected                         | 9.0 [8.0,10.1]   | 5.8 [5.1,6.5]    | 7.0 [6.4,7.7]    | 11.5 [10.4,12.7] | 12.6 [11.4,14.0] | 12.2 [11.1,13.3] |
| Unprotected                       | 8.6 [7.4,10.0]   | 6.8 [5.8,7.9]    | 7.5 [6.5,8.5]    | 10.6 [9.2,12.2]  | 12.6 [11.2,14.3] | 11.9 [10.6,13.2] |
| <b>Toilet facility</b>            |                  |                  |                  |                  |                  |                  |
| Improved                          | 7.2 [6.1,8.4]    | 3.8 [3.4,4.4]    | 5.2 [4.6,5.8]    | 8.9 [7.8,10.2]   | 8 [7.1,9.1]      | 8.4 [7.6,9.3]    |
| Unimproved                        | 11.1 [10.0,12.4] | 8.7 [7.6,9.8]    | 9.6 [8.8,10.6]   | 14.3 [12.9,15.8] | 18.3 [16.6,20.1] | 16.7 [15.3,18.2] |
| <b>Listening to the radio</b>     |                  |                  |                  |                  |                  |                  |
| Not at all                        | 8.7 [7.8,9.6]    | 5.8 [5.2,6.4]    | 6.9 [6.4,7.5]    | 11.0 [10.0,12.2] | 12.5 [11.4,13.8] | 11.9 [11.0,13.0] |
| Yes                               | 9.3 [8.0,10.7]   | 6.9 [5.9,8.0]    | 7.8 [7.0,8.8]    | 12.4 [11.2,13.8] | 13.4 [12.1,14.8] | 13.0 [11.9,14.2] |
| <b>Watching TV</b>                |                  |                  |                  |                  |                  |                  |

|                                           |                  |                  |                  |                   |                  |                  |
|-------------------------------------------|------------------|------------------|------------------|-------------------|------------------|------------------|
| Not at all                                | 17.5 [15.8,19.3] | 14.7 [13.0,16.4] | 15.8 [14.5,17.1] | 23.8[21.8,25.8]   | 32.8 [30.2,35.5] | 29.2 [27.2,31.2] |
| Yes                                       | 6.0 [5.3,6.8]    | 3.3 [2.9,3.7]    | 4.4 [3.9,4.8]    | 7.2 [6.4,8.1]     | 6.1 [5.5,6.9]    | 6.6 [6.0,7.2]    |
| <b>Dietary diversity</b>                  |                  |                  |                  |                   |                  |                  |
| 5+ foods                                  | 5.3 [4.5,6.3]    | 3.9 [3.1,4.9]    | 4.8 [4.1,5.5]    | 6.4 [5.3,7.6]     | 7.8 [6.6,9.2]    | 6.9 [6.1,7.8]    |
| <5 foods                                  | 10.4 [9.4,11.6]  | 6.3 [5.7,7.0]    | 7.7 [7.1,8.4]    | 13.4 [12.3,14.6]  | 13.3 [12.2,14.5] | 13.4 [12.4,14.4] |
| <b>Early initiation of breast feeding</b> |                  |                  |                  |                   |                  |                  |
| After 1 hr                                | 6.6 [5.7,7.8]    |                  | -                | 7.8 [6.8,8.9]     |                  | -                |
| Withing 1 hr                              | 11.0 [10.0,12.1] |                  | -                | 14.6 [13.4,15.8]  |                  | -                |
| <b>Duration of breast feeding</b>         |                  |                  |                  |                   |                  |                  |
| < 12 months                               | 9.3 [8.4, 10.3]  |                  |                  | 10.9 [9.9, 12.1]  |                  |                  |
| >12 months                                | 8.6 [7.5, 9.8]   |                  |                  | 11.6 [10.5, 12.9] |                  |                  |
| <b>Size of baby</b>                       |                  |                  |                  |                   |                  |                  |
| Average                                   | 8.0 [7.1,8.9]    | 5.8 [4.9,7.0]    | 7.1 [6.3,7.9]    | 9.5 [8.5,10.6]    | 10.9 [9.9,12.0]  | 10.9 [9.9,12.0]  |
| Small                                     | 12.7 [11.2,14.4] | 8.6 [7.0,10.4]   | 11.0 [9.8,12.3]  | 20.0 [17.9,22.2]  | 20.3 [18.4,22.3] | 20.3 [18.4,22.3] |
| Large                                     | 7.4 [6.0,9.0]    | 6.9 [5.3,9.1]    | 7.2 [6.1,8.6]    | 8.3 [6.9,10.0]    | 10.6 [9.2,12.2]  | 10.6 [9.2,12.2]  |
| <b>Diarrhoea previous two weeks</b>       |                  |                  |                  |                   |                  |                  |
| No                                        | 7.6 [6.9,8.3]    | 5.2 [4.6,5.8]    | 6.0 [5.5,6.6]    | 9.2 [8.4,10.1]    | 10.4 [9.5,11.4]  | 10.0 [9.2,10.8]  |
| Yes                                       | 13.4 [11.0,16.1] | 12 [10.5,13.6]   | 12.7 [11.2,14.4] | 18.7 [16.5,21.1]  | 27.9 [25.3,30.6] | 23.0 [21.0,25.1] |
| <b>Cough previous two weeks</b>           |                  |                  |                  |                   |                  |                  |
| No                                        | 8.5 [7.7,9.4]    | 5.7 [5.0,6.4]    | 6.8 [6.2,7.4]    | 11.0 [10.1,12.0]  | 12 [10.9,13.2]   | 11.6 [10.7,12.6] |
| Yes                                       | 9.8 [7.9,12.1]   | 6.9 [6.1,7.8]    | 8.0 [7.0,9.1]    | 12.0 [10.5,13.8]  | 14.2 [13.0,15.5] | 13.3 [12.2,14.5] |
